# Supplementary material for: Spaces of anthropogenic CO2 emissions compatible with planetary boundaries
Source: Research Square preprint supplement (doi:10.21203/rs.3.rs-3402213/v1), 2023-10-23
Supplement: Supplementary file 1 [file 92d8152819a96bc59ec00010.docx]

# Supplementary Information

# Coverage of AR6 scenarios

# As explained in the main text, our Pathfinder scenarios encompass the entirety of comparable AR6 scenarios in 100% of the configurations. This signifies that the estimated limits of the compatible spaces we explore are consistently less restrictive than those of the AR6 scenario ensemble, thereby confirming our exploration of a broader range of potential future scenarios (Figure S1 for illustration). Figure S9 provides a comparative analysis of the limits of the compatible space between AR6 scenarios and the scenarios generated by Pathfinder. The considered ensembles employ a consistent year of peak CO2 emissions in 2022, assuming net-zero achievable in 2050, prohibiting SRM, and permitting the deployment of CDR up to 10 PgC yr-1. Each subplot of Figure S9 represents a limit for a distinct key characteristic while the other pathway characteristics adhere to their default constraints. It is noteworthy that both AR6 and Pathfinder scenarios identify pathways that do not require the implementation of CDR (Figure S9.a). Figure S9.b, focusing on the year of peak CO2 emissions, reveals that Pathfinder identifies pathways capable of peaking between 2030 and 2040, irrespective of the safety level or boundary considered. In contrast, the AR6 scenarios indicate a peak in 2030 at latest or even 2025 for the Arctic sea ice boundary associated to a 90% safety level. Moreover, Figure S9.c demonstrates that Pathfinder scenarios exhibit peak CO2 emissions surpassing those depicted in AR6 scenarios across all boundaries and safety levels.

# Interpretation of the limits of compatible spaces

# We look at thousands of pathways in every state of the world. Although our sampling is extensive enough to provide a comprehensive estimation of the range of possibilities, it does not encompass every conceivable pathway. Consequently, situations arise in which, under identical constraints on all pathway characteristics except for one (e.g., 10 PgC yr-1 of CDR, absence SRM, net zero emissions by 2100), we may not identify a compatible pathway for all values of the variable pathway characteristic below the limit of the compatible space, in a given state of the world. For instance, we might establish a limit of the compatible space in 2037 for the peak date but fail to discover a pathway with a peak in 2035. For the sake of simplicity in interpreting the results, we assume that this pathway would be viable but was not generated by Pathfinder. To illustrate the advantages of this simplification, let us consider the result in which the limit of the compatible space for all boundaries combined is determined to be 2033 at a 67% safety level, with net-zero emissions achieved by 2050, CDR limited to 10 PgC yr-1, and no SRM. In practice, this outcome indicates that 67% of Pathfinder's configurations identify at least one pathway meeting these conditions with a peak date in 2033 or later. Consequently, it is plausible that a configuration exists with a pathway peaking in 2035 but no pathways peaking in 2033. By virtue of our assumption, we can confidently assert that 67% of Pathfinder's configurations discover at least one pathway with a peak date in 2033.
